# Supplementary material for: Life Expectancy in Marine Mammals Is Unrelated to Telomere Length but Is Associated With Body Size
Source: Front Genet. 2021 Sep 24;12:737860. doi: 10.3389/fgene.2021.737860 (PMC8498114; doi:10.3389/fgene.2021.737860)
Supplement: Supplementary file 2 [file Data_Sheet_2.XLSX]

## Sheet: Sheet1
Supplementary Table 2. Raw data
No.	Code	Date	Common Name	Scientific Name	Gender	Body length	Province	Gulf of Thailand	Andaman	rTL1	rTL2	rTL3	Mean	SD	mean	SD
135	END958	40869	Blainville's beaked whale	Mesoplodon densirostris	female	4.19	Phuket		Andaman	0.0862524	0.0782127	0.0560696	0.0735116	0.0156309	0.0735116	0.0156309
157	END1106	41299	Blue whale	Balaenoptera musculus	unknown	20	Trang		Andaman	0.0213634	0.0288269	0.0560486	0.035413	0.0182565	0.035413	0.0156309
1	END065	35307	Bryde's whale	Balaenoptera edeni	female	3.2	Rayong		Gulf of Thailand	0.0805691	0.0888319	0.177274	0.115558	0.0536066	0.0265581	0.0483658
5	END102	35921	Bryde's whale	Balaenoptera edeni	male	12	Chumphon		Gulf of Thailand	0.0169873	0.0176402	0.0113973	0.0153416	0.00343144
37	END206	37435	Bryde's whale	Balaenoptera edeni	male	3.73	Suratthani		Gulf of Thailand	0.0001869	0.00037606	0.000144855	0.000235938	0.000123156
70	END482	39226	Bryde's whale	Balaenoptera edeni	male	4.18	Chumphon		Gulf of Thailand	0.0098538	0.00633801	0.00697561	0.00772247	0.00152939
109	END617	40111	Bryde's whale	Balaenoptera edeni	unknown	5.5	Phuket		Andaman	0.0227072	0.0220906	0.0173865	0.0207281	0.00237624
114	END635	40228	Common bottlenose dolphin	Tursiops truncatus	female	1.19	Phuket		Andaman	0.00682297	0.0101946	0.0161003	0.0110393	0.004696	0.00850877	0.004696
20	END145	36383	Cuvier's beaked whale	Ziphius cavirostris	female	5.2	Stun		Andaman	0.0541893	0.0658452	0.0525468	0.0575271	0.00725031	0.0575271	0.00725031
80	END511	39603	Dwarf sperm whale	Kogia sima	female	2.02	Phuket		Andaman	0.0699788	0.211732	0.160692	0.147467	0.058621	0.0533418	0.0660839
97	END580	39929	Dwarf sperm whale	Kogia sima	male	1.2	Phuket		Andaman	0.0291722	0.0201521	0.00933894	0.0195544	0.0081079
99	END582	39938	Dwarf sperm whale	Kogia sima	male	2.3	Krabi		Andaman	0.058222	0.0163734	0.0423488	0.0389814	0.0172498
115	END643	40304	Dwarf sperm whale	Kogia sima	female	1.9	Phang Nga		Andaman	0.0105365	0.0105674	0.00480586	0.00863658	0.00331754
8	END113	36033	False killer whale	Pseudorca crassidens	female	3.39	Phuket		Andaman	0.246722	0.157599	0.101847	0.168723	0.0730755	0.155137	0.136549
32	END177	36858	False killer whale	Pseudorca crassidens	female	3.24	Phuket		Andaman	0.182048	0.197793	0.164501	0.181447	0.016654
64	END446	39049	False killer whale	Pseudorca crassidens	male		Songkla		Gulf of Thailand	0.390751	0.353767	0.095631	0.28005	0.131275
65	END447	39049	False killer whale	Pseudorca crassidens	female	2.06	Songkla		Gulf of Thailand	0.0183488	0.0373457	0.0137729	0.0231558	0.0102062
81	END517	39625	False killer whale	Pseudorca crassidens	female	3.52	Phuket		Andaman	0.376316	0.214909	0.446256	0.345827	0.0968764
154	END1095	41449	False killer whale	Pseudorca crassidens	female	1.72	Phuket		Andaman	0.00593732	0.00214546	0.00762681	0.00523653	0.00280707
177	END1237	41942.4	False killer whale	Pseudorca crassidens	male	3.09	Nakhon Sri Thammarat		Gulf of Thailand	0.0129068	0.0310292	0.0331457	0.0256939	0.0111244
181	END1335	42153.6	False killer whale	Pseudorca crassidens	female		Trang		Andaman	0.0663176	0.188249	0.100872	0.118479	0.0628436
4	END086	35864	Finless porpoise	Neophocaena phocaenoides	male	0.628	Nakhon Sri Thammarat		Gulf of Thailand	0.211298	0.100951	0.251387	0.187879	0.0779041	0.0524991	0.0776961
118	END665	40343	Finless porpoise	Neophocaena phocaenoides	female	1.22	Ranong		Andaman	0.000478459	0.000368019	0.000658625	0.000501701	0.000146691
188	END1606	42477	Finless porpoise	Neophocaena phocaenoides	female		Chonburi		Gulf of Thailand	0.00256494	0.00332219	0.003225	0.00303738	0.000412017
191	END1616	42676	Finless porpoise	Neophocaena phocaenoides	unknown	1	Stun		Andaman	0.0761999	0.0753557	0.0700747	0.0738768	0.00331965
212	END2403	43638	Finless porpoise	Neophocaena phocaenoides	unknown		Trang		Andaman	0.0315858	0.0228658	0.0467237	0.0337251	0.0120719
94	END573	40031	Fraser's dolphin	Lagenodelphis hosei	female	2.17	Stun		Andaman	0.429437	0.191534	0.234618	0.285196	0.103499	0.125425	0.164292
95	END577	39909	Fraser's dolphin	Lagenodelphis hosei	female	2.2	Trang		Andaman	0.47759	0.322968	0.303062	0.367873	0.0780059
106	END605	40015	Fraser's dolphin	Lagenodelphis hosei	female	1.53	Phuket		Andaman	0.00153629	0.00149056	0.00176987	0.00159891	0.000122323
107	END610	40068	Fraser's dolphin	Lagenodelphis hosei	female	2.26	Phuket		Andaman	0.0240617	0.0337093	0.0280307	0.0286006	0.0039592
143	END1016	41147	Fraser's dolphin	Lagenodelphis hosei	male	19.6	Phang Nga		Andaman	0.0100091	0.00177273	0.225375	0.0790521	0.126786
197	END1998	42896	Fraser's dolphin	Lagenodelphis hosei	female	2.3	Phang Nga		Andaman	0.00337128	0.00762425	0.00658293	0.00585949	0.00221686
2	END080	35752	Indo-Pacific bottlenose dolphin	Tursiops aduncus	male	0.92	Narathiwat		Gulf of Thailand	0.587588	0.701408	0.806102	0.698366	0.109289	0.206163	0.274551
27	END162	36993	Indo-Pacific bottlenose dolphin	Tursiops aduncus	unknown		Ranong		Andaman	0.0129626	0.0104343	0.00559182	0.00966289	0.00374545
42	END269	37514	Indo-Pacific bottlenose dolphin	Tursiops aduncus	female	2.29	Phuket		Andaman	0.00192845	0.000818275	0.257716	0.0868211	0.148001
49	END392	38608	Indo-Pacific bottlenose dolphin	Tursiops aduncus	male	2.46	Phuket		Andaman	0.0376279	0.000314539	0.000369714	0.0127707	0.021527
52	END398	38651	Indo-Pacific bottlenose dolphin	Tursiops aduncus	female	0.9	Krabi		Andaman	0.646731	0.377964	0.623507	0.549401	0.121594
53	END400	38714	Indo-Pacific bottlenose dolphin	Tursiops aduncus	unknown		Phuket		Andaman	0.787098	0.364129	0.155055	0.435427	0.262909
77	END496	39418	Indo-Pacific bottlenose dolphin	Tursiops aduncus	male	1.92	Phuket		Andaman	0.320452	0.21256	0.202849	0.245287	0.0532974
78	END497	39489	Indo-Pacific bottlenose dolphin	Tursiops aduncus	male	2.13	Phuket		Andaman	0.123188	0.111237	0.0813717	0.105266	0.0175859
79	END506	39570	Indo-Pacific bottlenose dolphin	Tursiops aduncus	male		Phuket		Andaman	0.0250883	0.0223019	0.0604007	0.0359303	0.0173405
88	END539	39714	Indo-Pacific bottlenose dolphin	Tursiops aduncus	female	2.22	Phang Nga		Andaman	0.00800372	0.0186027	0.0916063	0.0394042	0.0371652
89	END540	39716	Indo-Pacific bottlenose dolphin	Tursiops aduncus	unknown		Trang		Andaman	0.323213	1.21185	0.852419	0.795829	0.364986
90	END541	39738	Indo-Pacific bottlenose dolphin	Tursiops aduncus	unknown	2.5	Phuket		Andaman	0.0078441	0.0074192	0.00741903	0.00756077	0.00020034
98	END581	39934	Indo-Pacific bottlenose dolphin	Tursiops aduncus	unknown	2.03	Phuket		Andaman	0.0653812	0.0535649	0.0993722	0.0727728	0.0194174
126	END717	40635	Indo-Pacific bottlenose dolphin	Tursiops aduncus	male	2.35	Phuket		Andaman	0.00298924	0.00260707	0.00360578	0.00306736	0.000503918
150	END1054	41330	Indo-Pacific bottlenose dolphin	Tursiops aduncus	female		Phuket		Andaman	0.149119	0.0963435	0.180739	0.142067	0.0426375
162	END1114	41540	Indo-Pacific bottlenose dolphin	Tursiops aduncus	unknown	1.6	Stun		Andaman	0.472082	0.501666	0.243988	0.405912	0.141008
165	END1176	41717	Indo-Pacific bottlenose dolphin	Tursiops aduncus	male	2.24	Phuket		Andaman	0.023262	0.0186399	0.288752	0.110218	0.154632
166	END1184	41680	Indo-Pacific bottlenose dolphin	Tursiops aduncus	female		Trang		Andaman	0.0537124	0.0531466	0.0566746	0.0545112	0.00189477
167	END1205	41818	Indo-Pacific bottlenose dolphin	Tursiops aduncus	female	1.81	Trang		Andaman	0.0315187	0.100795	0.0727716	0.0683617	0.0348479
185	END1528	42241	Indo-Pacific bottlenose dolphin	Tursiops aduncus	female		Phang Nga		Andaman	0.292748	0.323586	0.240738	0.28569	0.0418724
187	END1551	42311	Indo-Pacific bottlenose dolphin	Tursiops aduncus	female	1.82	Phuket		Andaman	0.0331998	0.0196772	0.0208288	0.0245686	0.007497
189	END1607	42521	Indo-Pacific bottlenose dolphin	Tursiops aduncus	unknown	1.07	Krabi		Andaman	0.339774	0.520775	0.607482	0.489344	0.136594
196	END1991	42804	Indo-Pacific bottlenose dolphin	Tursiops aduncus	unknown		Phuket		Andaman	0.0299382	0.0246804	0.0240975	0.0262387	0.00321706
202	END2047	42981	Indo-Pacific bottlenose dolphin	Tursiops aduncus	unknown		Krabi		Andaman	0.0145909	0.00900926	0.011319	0.0116397	0.00280461
204	END2156	43148	Indo-Pacific bottlenose dolphin	Tursiops aduncus	unknown	1.922	Phang Nga		Andaman	0.969343	0.515991	0.720204	0.735179	0.227047
214	END2999	43291	Indo-Pacific bottlenose dolphin	Tursiops aduncus	male	0.95	Krabi		Andaman	0.0429393	0.0386056	0.0303544	0.0372998	0.00639328
136	END989	40994	Indo-Pacific humpback dolphin	Sousa chinensis	male	2.21	Suratthani		Gulf of Thailand	0.149977	0.137816	0.0574762	0.11509	0.0502642	0.0468513	0.0507713
205	END2172	43228	Indo-Pacific humpback dolphin	Sousa chinensis	unknown		Trang		Andaman	0.0114926	0.0117886	0.00819056	0.0104906	0.00199738
210	END2320	43326	Indo-Pacific humpback dolphin	Sousa chinensis	unknown		Trang		Andaman	0.0182438	0.0113698	0.00737851	0.0123307	0.00549602
213	END2404	43640	Indo-Pacific humpback dolphin	Sousa chinensis	unknown		Trang		Andaman	0.0219734	0.0121481	0.0222111	0.0187776	0.00574249
63	END435	36531	Irrwaddy dolphin	Orcaella brevirostris	unknown		Pattalung		Gulf of Thailand	0.00156584	0.00193122	0.00206462	0.00185389	0.000210838	0.0687079	0.043505
209	END2304	43329.5	Irrwaddy dolphin	Orcaella brevirostris	unknown		Suratthani		Gulf of Thailand	0.1298	0.110066	0.0156024	0.0851561	0.061038
39	END210	37475	Long-beaked common dolphin	Delphinus delphis	male	2.3	Prachuapkhirikhan		Gulf of Thailand	0.0235559	0.0197575	0.0118492	0.0183875	0.00597237	0.0127868	0.00897174
102	END586	39966	Long-beaked common dolphin	Delphinus delphis	male	3.1	Phang Nga		Andaman	0.00299628	0.00483761	0.00291528	0.00358306	0.000887717
25	END156	36495	Omura's whale	Balaenoptera omurai	female	4.3	Phang Nga		Andaman	0.015688	0.0558692	0.0152447	0.028934	0.0233277	0.231045	0.229674
47	END389	38564	Omura's whale	Balaenoptera omurai	unknown	9	Trang		Andaman	0.33223	0.276811	0.353658	0.3209	0.0396566
69	END479	39211	Omura's whale	Balaenoptera omurai	female	3	Phuket		Andaman	0.50384	0.652793	0.393592	0.516742	0.106211
169	END1213	41857	Omura's whale	Balaenoptera omurai	unknown		Prachuapkhirikhan		Gulf of Thailand	0.00698125	0.00414525	0.00546178	0.00552943	0.00141921
3	END085	35868	Pantropical spotted dolphin	Stenella attenuata	female	1.95	Phang Nga		Andaman	0.148499	0.161647	0.114876	0.141674	0.0241209	0.186581	0.165098
9	END119	36054	Pantropical spotted dolphin	Stenella attenuata	female	2	Phuket		Andaman	0.0779133	0.140622	0.148018	0.122184	0.0385179
17	END137	36200	Pantropical spotted dolphin	Stenella attenuata	male	1.9	Phang Nga		Andaman	0.268249	0.199319	0.360395	0.275988	0.0808161
18	END138	36200	Pantropical spotted dolphin	Stenella attenuata	male	2.2	Phang Nga		Andaman	0.314551	0.284855	0.321273	0.306893	0.0193788
19	END139	36200	Pantropical spotted dolphin	Stenella attenuata	male	2.03	Phang Nga		Andaman	0.497846	0.76042	0.760329	0.672865	0.151571
28	END163	36650	Pantropical spotted dolphin	Stenella attenuata	female	2	Phuket		Andaman	0.167939	0.207768	0.203919	0.193209	0.0219687
35	END194	37253	Pantropical spotted dolphin	Stenella attenuata	male	1.2	Nakhon Sri Thammarat		Gulf of Thailand	0.0954299	0.165608	0.144426	0.135154	0.0359958
54	END403	38800	Pantropical spotted dolphin	Stenella attenuata	male	2.05	Phang Nga		Andaman	0.155354	0.172734	0.162824	0.163637	0.0071185
55	END404	38800	Pantropical spotted dolphin	Stenella attenuata	female	1.95	Phang Nga		Andaman	0.0337382	0.032113	0.0319603	0.0326038	0.000804526
56	END405	38800	Pantropical spotted dolphin	Stenella attenuata	female	1.87	Phang Nga		Andaman	0.293078	0.165077	0.186404	0.214853	0.0559947
57	END406	38800	Pantropical spotted dolphin	Stenella attenuata	male	2.09	Phang Nga		Andaman	0.427004	0.413832	0.679505	0.50678	0.122253
58	END407	38800	Pantropical spotted dolphin	Stenella attenuata	male	2.14	Phang Nga		Andaman	0.143066	0.130062	0.181028	0.151385	0.0216221
66	END448	39121	Pantropical spotted dolphin	Stenella attenuata	female	1.91	Phuket		Andaman	0.217655	0.211536	0.188164	0.205785	0.012708
68	END459	39156	Pantropical spotted dolphin	Stenella attenuata	male	1.45	Phuket		Andaman	0.159417	0.163898	0.100662	0.141325	0.0288118
74	END488	39274	Pantropical spotted dolphin	Stenella attenuata	male	2.15	Phuket		Andaman	0.217655	0.211536	0.188164	0.205785	0.012708
83	END534	39664	Pantropical spotted dolphin	Stenella attenuata	unknown	1.52	Phuket		Andaman	0.0502596	0.0442956	0.0421577	0.045571	0.00342836
84	END535	39697	Pantropical spotted dolphin	Stenella attenuata	female	2.02	Trang		Andaman	0.116074	0.135039	0.132023	0.127712	0.00832121
85	END536	39703	Pantropical spotted dolphin	Stenella attenuata	male	1.48	Phuket		Andaman	0.00669881	0.00647956	0.00730659	0.00682832	0.000349832
86	END537	39703	Pantropical spotted dolphin	Stenella attenuata	unknown		Phuket		Andaman	0.26005	0.114249	0.0965632	0.156954	0.0732567
93	END561	39818	Pantropical spotted dolphin	Stenella attenuata	male		Trang		Andaman	0.363746	0.397252	0.195599	0.318866	0.0882293
101	END585	39964	Pantropical spotted dolphin	Stenella attenuata	unknown	138	Phuket		Andaman	0.087545	0.517109	0.117931	0.240862	0.19573
103	END599	39992	Pantropical spotted dolphin	Stenella attenuata	female	1.32	Phuket		Andaman	0.0702259	0.124986	0.106599	0.100603	0.0227539
104	END600	39992	Pantropical spotted dolphin	Stenella attenuata	male	1.3	Phuket		Andaman	0.119379	0.120854	0.0509942	0.0970757	0.0325902
116	END659	40329	Pantropical spotted dolphin	Stenella attenuata	male	2.26	Phuket		Andaman	0.599658	0.19518	0.522581	0.43914	0.214762
133	END810	40796	Pantropical spotted dolphin	Stenella attenuata	unknown	1.04	Krabi		Andaman	0.0233326	0.0263266	0.0320469	0.0272354	0.00442766
158	END1107	41507	Pantropical spotted dolphin	Stenella attenuata	female	1.74	Phuket		Andaman	0.0457576	0.063509	0.0501054	0.053124	0.00925266
195	END1787	42683.6	Pantropical spotted dolphin	Stenella attenuata	unknown		Phuket		Andaman	0.362769	0.214574	0.224423	0.267256	0.0828635
203	END2096	43004	Pantropical spotted dolphin	Stenella attenuata	unknown		Ranong		Andaman	0.035723	0.0702316	0.138617	0.0815237	0.052368
211	END2401	43475	Pantropical spotted dolphin	Stenella attenuata	male	1.47	Krabi		Andaman	0.00621225	0.00573795	0.00678032	0.0062435	0.000521888
26	END158	36561	Pygmy sperm whale	Kogia breviceps	female	2.6	Chumphon		Gulf of Thailand	0.0772158	0.233628	0.17731	0.162718	0.0792206	0.354671	0.24662
67	END457	39117	Pygmy sperm whale	Kogia breviceps	male	2.4	Prachuapkhirikhan		Gulf of Thailand	0.441338	0.304877	0.141287	0.295834	0.122662
201	END2046	42978	Pygmy sperm whale	Kogia breviceps	female		Trang		Andaman	0.835894	0.235073	0.608003	0.559656	0.303314
59	END408	38854	Risso's dolphin	Grampus griseus	female	1.96	Phuket		Andaman	0.282184	0.0824454	0.263132	0.209254	0.090004	0.126517	0.133886
110	END623	40159	Risso's dolphin	Grampus griseus	female	2.44	Phuket		Andaman	0.259005	0.342181	0.0316117	0.210933	0.131267
112	END631	40206	Risso's dolphin	Grampus griseus	male	2.8	Nakhon Sri Thammarat		Gulf of Thailand	0.000516295	0.00530636	0.000146306	0.00198965	0.00235013
125	END697	40594	Risso's dolphin	Grampus griseus	male	2.35	Prachuapkhirikhan		Gulf of Thailand	0.0136845	0.0268168	0.0107091	0.0170701	0.008571
62	END412	38915	Rough-toothed dolphin	Steno bredanensis	female	2.17	Phuket		Andaman	0.00140211	0.000516307	0.0012163	0.00104491	0.000381397	0.101561	0.159221
130	END736	40730	Rough-toothed dolphin	Steno bredanensis	female	2.14	Phang Nga		Andaman	0.0196155	0.0166871	0.0289921	0.0217649	0.00642792
131	END737	40730	Rough-toothed dolphin	Steno bredanensis	male	2.1	Phang Nga		Andaman	0.00871653	0.00696443	0.00134265	0.00567453	0.00385245
170	END1216	41871.3	Rough-toothed dolphin	Steno bredanensis	male		Stun		Andaman	0.000686035	0.00045445	0.000816739	0.000652408	0.000183471
171	END1217	41871.3	Rough-toothed dolphin	Steno bredanensis	female		Stun		Andaman	0.078602	0.140244	0.102716	0.107187	0.0310635
172	END1218	41871.3	Rough-toothed dolphin	Steno bredanensis	male		Stun		Andaman	0.0576388	0.0373247	0.0343857	0.0431164	0.0126624
198	END2012	42909.4	Rough-toothed dolphin	Steno bredanensis	unknown		Trang		Andaman	0.584546	0.468453	0.252765	0.435254	0.168364
113	END632	40206	Short-finned pilot whale	Globicephala macrorhynchus	female	3.44	Nakhon Sri Thammarat		Gulf of Thailand	0.0626688	0.142894	0.117199	0.107587	0.0409674	0.102782	0.0409674
7	END107	35968	Sperm whale	Physeter macrocephalus	female	8.15	Phuket		Andaman	0.510392	0.472565	0.414557	0.465838	0.0482701	0.112129	0.186947
60	END409	38861	Sperm whale	Physeter macrocephalus	unknown	4.3	Phuket		Andaman	0.0341575	0.0460404	0.0556808	0.0452929	0.0088027
75	END490	39292	Sperm whale	Physeter macrocephalus	female	3.56	Trang		Andaman	0.0153063	0.0120739	0.0101043	0.0124948	0.00214443
142	END1005	41142	Sperm whale	Physeter macrocephalus	female	10	Phang Nga		Andaman	0.00713847	0.00785225	0.00615932	0.00705001	0.000849924
192	END1668	24623	Sperm whale	Physeter macrocephalus	unknown		Phuket		Andaman	0.00872611	0.0070387	0.00572217	0.00716233	0.00150578
10	END122	36052	Spinner dolphin	Stenella longirostris	female	1.64	Ranong		Andaman	0.0949238	0.0587471	0.0922633	0.0819781	0.0201625	0.0987664	0.120812
11	END128	36185	Spinner dolphin	Stenella longirostris	male	1.8	Trang		Andaman	0.282797	0.321325	0.258646	0.287589	0.0316133
12	END129	36185	Spinner dolphin	Stenella longirostris	male	1.77	Trang		Andaman	0.255637	0.221213	0.200535	0.225795	0.0278352
13	END130	36185	Spinner dolphin	Stenella longirostris	male	1.9	Trang		Andaman	0.497852	0.502186	0.349701	0.449913	0.0868133
14	END131	36185	Spinner dolphin	Stenella longirostris	male	1.785	Trang		Andaman	0.000819699	0.00100069	0.00135939	0.00105993	0.00027468
15	END132	36452	Spinner dolphin	Stenella longirostris	male	1.83	Trang		Andaman	0.0143791	0.0172407	0.0148068	0.0154755	0.00154359
16	END133	36185	Spinner dolphin	Stenella longirostris	male	1.88	Trang		Andaman	0.0047229	0.00364921	0.0043945	0.00425554	0.000550167
41	END268	37509	Spinner dolphin	Stenella longirostris	male	1.12	Phuket		Andaman	0.297494	0.248142	0.261999	0.269212	0.0254542
48	END391	38596	Spinner dolphin	Stenella longirostris	male	1.16	Phuket		Andaman	0.00277287	0.00276177	0.00324533	0.00292666	0.000276034
50	END393	38619	Spinner dolphin	Stenella longirostris	male	1.59	Phuket		Andaman	0.144812	0.159847	0.191899	0.165519	0.0196369
71	END485	39264	Spinner dolphin	Stenella longirostris	female	1.68	Phuket		Andaman	0.0901419	0.0964698	0.118213	0.101608	0.0120223
100	END583	39943	Spinner dolphin	Stenella longirostris	male	1.77	Phuket		Andaman	0.110069	0.160181	0.123716	0.131322	0.0211533
108	END614	40099	Spinner dolphin	Stenella longirostris	male	1.7	Phuket		Andaman	0.0274146	0.0498542	0.0706444	0.0493044	0.0176528
117	END655	40287	Spinner dolphin	Stenella longirostris	female	1.51	Phuket		Andaman	0.0018976	0.00316896	0.000863537	0.0019767	0.00115474
119	END666	40344	Spinner dolphin	Stenella longirostris	female	1.81	Phuket		Andaman	0.0127892	0.012663	0.0139194	0.0131239	0.000691838
120	END667	40344	Spinner dolphin	Stenella longirostris	male	1.66	Krabi		Andaman	0.106256	0.060439	0.0622068	0.0763008	0.0259574
122	END671	40396	Spinner dolphin	Stenella longirostris	female	1.51	Phuket		Andaman	0.0868512	0.11238	0.0510545	0.0834286	0.0308057
127	END727	40683	Spinner dolphin	Stenella longirostris	female	1.45	Nakhon Sri Thammarat		Gulf of Thailand	0.0586665	0.0651879	0.0524796	0.058778	0.00635489
129	END734	40715	Spinner dolphin	Stenella longirostris	unknown		Phuket		Andaman	0.0935205	0.0700282	0.0536645	0.0724044	0.020034
132	END738	40733	Spinner dolphin	Stenella longirostris	male	1.44	Phuket		Andaman	0.0269251	0.106364	0.034255	0.0558481	0.0439014
139	END1002	41110	Spinner dolphin	Stenella longirostris	female	1.23	Trang		Andaman	0.0328073	0.0282353	0.0431318	0.0347248	0.00763112
140	END1003	41113	Spinner dolphin	Stenella longirostris	unknown	1.78	Phuket		Andaman	0.0222083	0.0171166	0.0196738	0.0196662	0.00254585
145	END1021	41179	Spinner dolphin	Stenella longirostris	female		Phuket		Andaman	0.0330257	0.0281145	0.0303055	0.0304819	0.00246035
146	END1035	41244	Spinner dolphin	Stenella longirostris	male	1.12	Krabi		Andaman	0.148705	0.786284	0.237591	0.39086	0.345319
151	END1064	41354	Spinner dolphin	Stenella longirostris	unknown	146.6	Phuket		Andaman	0.0371411	0.0432332	0.0647992	0.0483912	0.0145326
152	END1071	41381	Spinner dolphin	Stenella longirostris	female	1.85	Phuket		Andaman	0.0163875	0.0236991	0.020756	0.0202809	0.00367891
153	END1074	41383	Spinner dolphin	Stenella longirostris	female	1.8	Phang Nga		Andaman	0.0106482	0.0107555	0.00930576	0.0102365	0.000807815
155	END1097	41460	Spinner dolphin	Stenella longirostris	female	131	Phuket		Andaman	0.108009	0.110658	0.116277	0.111648	0.004222
161	END1113	41534	Spinner dolphin	Stenella longirostris	female	1.86	Krabi		Andaman	0.0129047	0.0113225	0.0106733	0.0116335	0.00114779
168	END1210	41855	Spinner dolphin	Stenella longirostris	female	1.85	Phuket		Andaman	0.0727968	0.0456298	0.0368357	0.0517541	0.0187465
175	END1223	41919.7	Spinner dolphin	Stenella longirostris	male	1.4	Phuket		Andaman	0.130803	0.10749	0.0977978	0.11203	0.0169648
179	END1328	42132	Spinner dolphin	Stenella longirostris	male	1.5	Phuket		Andaman	0.0600348	0.0492806	0.0383864	0.0492339	0.0108243
180	END1330	42148	Spinner dolphin	Stenella longirostris	unknown	1.89	Phuket		Andaman	0.0908057	0.077803	0.0656487	0.0780858	0.0125809
183	END1480	41739	Spinner dolphin	Stenella longirostris	female	1.47	Phang Nga		Andaman	0.0572047	0.0594184	0.0267116	0.0477782	0.0182778
6	END106	35964	Striped dolphin	Stenella coeruleoalba	male	2.28	Phuket		Andaman	0.120071	0.105368	0.120915	0.115451	0.00874259	0.0725558	0.166557
21	END147	36390	Striped dolphin	Stenella coeruleoalba	male	2.12	Phuket		Andaman	0.059843	0.0517796	0.063859	0.0584939	0.00615166
22	END152	36467	Striped dolphin	Stenella coeruleoalba	male	1.96	Phuket		Andaman	0.000809562		0.00300808	0.107052	0.182117
23	END153	36476	Striped dolphin	Stenella coeruleoalba	female	1.845	Phuket		Andaman	0.00432248	0.00235827	0.00321619	0.00329898	0.00098472
24	END154	36476	Striped dolphin	Stenella coeruleoalba	female	2	Phuket		Andaman	0.0594527	0.0519992	0.0534356	0.0549625	0.00395441
29	END164	36654	Striped dolphin	Stenella coeruleoalba	female	1.8	Phuket		Andaman	0.00199313	0.00169537	0.00200015	0.00189622	0.000173973
30	END172	36726	Striped dolphin	Stenella coeruleoalba	male	2.09	Stun		Andaman	0.00969183	0.00689437	0.0094025	0.0086629	0.00153841
31	END173	36727	Striped dolphin	Stenella coeruleoalba	female	1.95	Phuket		Andaman	0.112303	0.109405	0.0874667	0.103058	0.0135802
33	END179	36956	Striped dolphin	Stenella coeruleoalba	male	2.15	Phuket		Andaman	0.0152929	0.0149281	0.0104451	0.0135554	0.00269976
34	END192	37227	Striped dolphin	Stenella coeruleoalba	male	1.87	Phuket		Andaman	0.00188847	0.00170754	0.00242329	0.00200643	0.000372166
36	END205	37435	Striped dolphin	Stenella coeruleoalba	male	1.87	Phuket		Andaman	0.366233	0.314254	0.270958	0.317149	0.0477031
40	END211	37482	Striped dolphin	Stenella coeruleoalba	female	2.07	Phuket		Andaman	0.00663329	0.00761519	0.00961492	0.00795447	0.0015195
43	END273	37544	Striped dolphin	Stenella coeruleoalba	male	1.823	Phuket		Andaman		0.276899	0.259729	0.329983	0.107158
44	END381	38444	Striped dolphin	Stenella coeruleoalba	unknown	1.81	Phang Nga		Andaman	0.0596808	0.0479241	0.0464815	0.0513621	0.00724022
45	END384	38894	Striped dolphin	Stenella coeruleoalba	female	2.12	Phang Nga		Andaman	0.00645936	0.0080442	0.0079968	0.00750012	0.000901634
46	END387	38577	Striped dolphin	Stenella coeruleoalba	female	2.11	Phang Nga		Andaman				0.394032	0.0875424
51	END395	38631	Striped dolphin	Stenella coeruleoalba	female	1.93	Phuket		Andaman	0.0643659	0.568872	0.869427	0.500888	0.332162
61	END410	38876	Striped dolphin	Stenella coeruleoalba	female	2.2	Phuket		Andaman	0.0443456	0.168101	0.130087	0.114178	0.0517601
72	END486	39265	Striped dolphin	Stenella coeruleoalba	female	1.87	Phang Nga		Andaman	0.120306	0.0804691	0.0767377	0.0925043	0.0197178
73	END487	39268	Striped dolphin	Stenella coeruleoalba	female	1.73	Phuket		Andaman	0.0442132	0.0707055	0.0704274	0.0617821	0.0124236
76	END493	39315	Striped dolphin	Stenella coeruleoalba	male	2.14	Stun		Andaman	0.0343496	0.0344757	0.0267796	0.0318683	0.00359865
82	END528	39627	Striped dolphin	Stenella coeruleoalba	female	1.81	Phuket		Andaman	0.00760526	0.00638231	0.00668595	0.00689117	0.000519928
87	END538	39706	Striped dolphin	Stenella coeruleoalba	male	1.66	Phang Nga		Andaman	0.0990641	0.0943882	0.0642146	0.085889	0.0154445
91	END542	39750	Striped dolphin	Stenella coeruleoalba	female	1.69	Phuket		Andaman	0.0333414	0.0456776	0.0309336	0.0366509	0.00645812
92	END543	39752	Striped dolphin	Stenella coeruleoalba	male	2.2	Phuket		Andaman	0.0780235	0.0729496	0.0588701	0.0699477	0.00810234
96	END579	39927	Striped dolphin	Stenella coeruleoalba	male	1.99	Ranong		Andaman	0.0144532	0.0137941	0.0147811	0.0143428	0.000410448
111	END626	40162	Striped dolphin	Stenella coeruleoalba	male	2.04	Ranong		Andaman	0.0527503	0.0361689	0.0397598	0.042893	0.00712268
121	END670	40374	Striped dolphin	Stenella coeruleoalba	male	1.94	Phuket		Andaman	0.0434724	0.029418	0.00723267	0.0267077	0.0182712
123	END672	40401	Striped dolphin	Stenella coeruleoalba	male	1.51	Phuket		Andaman	0.0258286	0.0307761	0.0309291	0.029178	0.00290161
124	END680	40450	Striped dolphin	Stenella coeruleoalba	female	1.85	Trang		Andaman	0.11512	0.149587	0.104174	0.12296	0.0237002
128	END729	40693	Striped dolphin	Stenella coeruleoalba	unknown	2.17	Ranong		Andaman	0.0252043	0.0385058	0.0192092	0.0276398	0.00987618
134	END812	40802	Striped dolphin	Stenella coeruleoalba	unknown		Krabi		Andaman	0.166603	0.139949	0.120116	0.142223	0.0233268
137	END997	41049	Striped dolphin	Stenella coeruleoalba	female	16.93	Phuket		Andaman	0.156394	0.0743314	0.0746648	0.101797	0.0472831
138	END1000	41079	Striped dolphin	Stenella coeruleoalba	male	2.014	Stun		Andaman	0.00108248	0.00107758	0.00152355	0.00122787	0.000256078
141	END1004	41120	Striped dolphin	Stenella coeruleoalba	male	1.68	Phang Nga		Andaman	0.0118161	0.0134798	0.0101837	0.0118265	0.00164806
144	END1018	41171	Striped dolphin	Stenella coeruleoalba	unknown	1.69	Phang Nga		Andaman	0.063237	0.0640221	0.0551143	0.0607912	0.00493193
147	END1036	41278	Striped dolphin	Stenella coeruleoalba	female	2.09	Phang Nga		Andaman				5.48513	0.330171
148	END1037	41278	Striped dolphin	Stenella coeruleoalba	male	1.26	Phang Nga		Andaman	0.0369141	0.0291324	0.0335739	0.0332068	0.00390383
149	END1048	41325	Striped dolphin	Stenella coeruleoalba	female	1.9	Trang		Andaman	0.0395433	0.0413191	0.00724728	0.0293699	0.0191793
156	END1105	41548	Striped dolphin	Stenella coeruleoalba	female	2.02	Trang		Andaman	0.0169801	0.0132383	0.0135261	0.0145815	0.00208224
159	END1111	41526	Striped dolphin	Stenella coeruleoalba	male	1.78	Phang Nga		Andaman	0.0620126	0.0407435	0.0467315	0.0498292	0.0109677
160	END1112	41534	Striped dolphin	Stenella coeruleoalba	female		Trang		Andaman	0.0106983	0.0139327	0.00710232	0.0105778	0.0034168
163	END1118	41552	Striped dolphin	Stenella coeruleoalba	male	1.8	Phuket		Andaman	0.063237	0.0640221	0.0551143	0.0607912	0.00493193
164	END1119	41566	Striped dolphin	Stenella coeruleoalba	female	1.78	Phuket		Andaman	0.0393052	0.0314394	0.027574	0.0327729	0.00597821
173	END1221	41870.3	Striped dolphin	Stenella coeruleoalba	female	2.1	Trang		Andaman	0.000968236	0.00162828	0.00140448	0.00133366	0.00033567
174	END1222	41870.3	Striped dolphin	Stenella coeruleoalba	male	1.52	Trang		Andaman	0.0175273	0.0153703	0.0201471	0.0176816	0.00239212
178	END1327	42131	Striped dolphin	Stenella coeruleoalba	female	1.82	Phuket		Andaman	0.0121393	0.0116805	0.0143029	0.0127076	0.00140052
182	END1338	42164	Striped dolphin	Stenella coeruleoalba	male	1.7	Trang		Andaman	0.0097749	0.00695851	0.00602408	0.00758583	0.00195251
184	END1519	42262	Striped dolphin	Stenella coeruleoalba	female	2.15	Phuket		Andaman	0.00620641	0.00971131	0.00913375	0.00835049	0.00187915
186	END1542	42293	Striped dolphin	Stenella coeruleoalba	female	1.78	Trang		Andaman	0.0309499	0.0217154	0.0201544	0.0242732	0.00583463
190	END1612	42523	Striped dolphin	Stenella coeruleoalba	unknown	1.8	Phang Nga		Andaman	0.69548	1.09391	1.31366	1.03435	0.313364
193	END1679	42564	Striped dolphin	Stenella coeruleoalba	female	2.29	Phuket		Andaman	0.0393899	0.0321257	0.0283055	0.0332737	0.00563068
194	END1680	42566	Striped dolphin	Stenella coeruleoalba	unknown	2.6	Krabi		Andaman	0.117954	0.105789	0.108227	0.110657	0.00643623
199	END2036	42947	Striped dolphin	Stenella coeruleoalba	male	1.98	Phuket		Andaman	0.0400748	0.04388	0.0218299	0.0352616	0.0117867
206	END2273	43242	Striped dolphin	Stenella coeruleoalba	male		Phuket		Andaman	0.0852289	0.0245754	0.0586869	0.0561637	0.0304053
207	END2275	43266	Striped dolphin	Stenella coeruleoalba	male	2.15	Phang Nga		Andaman	0.00194402	0.00170078	0.00211643	0.00192041	0.000208828
208	END2303	43394	Striped dolphin	Stenella coeruleoalba	unknown		Stun		Andaman	0.0718142	0.0747606	0.0479931	0.0648559	0.0146778
1	DU10		Dugong	Dugong dugong	female	1.06	Trang		Andaman	0.184456	0.163246	0.107348	0.151683	0.0398328	0.297314	0.909959
2	DU12		Dugong	Dugong dugong	female	1.27	Trang		Andaman	0.921212	0.860473	1.11258	0.964754	0.131572
3	DU15		Dugong	Dugong dugong	male	0.97	Suratthani		Gulf of Thailand	1.38	1.15138	1.44639	1.32592	0.154757
4	DU26		Dugong	Dugong dugong	male	2	Krabi		Andaman	2.24983	2.62943	1.22062	2.03329	0.728938
5	DU29		Dugong	Dugong dugong	male	1.31	Phang Nga		Andaman	0.386603	0.348004	0.702472	0.479026	0.19447
6	DU30		Dugong	Dugong dugong	female	2.42	Rayong		Gulf of Thailand	0.0998567	0.102879	0.095559	0.0994315	0.00367846
7	DU34-DU34 fetus		Dugong	Dugong dugong	female	2.55	Trang		Andaman	0.342182	0.307226	0.56925	0.406219	0.142266
8	DU35		Dugong	Dugong dugong	male	1.55	Phang Nga		Andaman	1.04538	0.833233	0.815999	0.898203	0.127747
9	DU36		Dugong	Dugong dugong	female	2.73	Trang		Andaman	0.164049	0.261033	0.124092	0.183058	0.0704219
10	DU43		Dugong	Dugong dugong	female	2.14	Ranong		Andaman	0.0343496	0.0344757	0.0267796	0.0318683	0.00440742
11	DU47		Dugong	Dugong dugong	male	2.21	Phang Nga		Andaman	0.0563328	0.0729872	0.050011	0.059777	0.011869
12	DU48		Dugong	Dugong dugong	female	2.71	Ranong		Andaman	0.0163948	0.0224001	0.0119653	0.0169201	0.00523719
13	DU51		Dugong	Dugong dugong	male	2	Trang		Andaman	0.414073	0.427766	0.479211	0.44035	0.0343442
14	DU52		Dugong	Dugong dugong	male	2.3	Trang		Andaman	0.0874208	0.0807297	0.0469176	0.0716894	0.0217123
15	DU57		Dugong	Dugong dugong	female	2.56	Trang		Andaman	0.237732	0.385729	0.305184	0.309548	0.0740946
16	DU58		Dugong	Dugong dugong	male	2.5	Trang		Andaman	0.592368	0.572267	0.590989	0.585208	0.0112287
17	DU59		Dugong	Dugong dugong	male	2.45	Trang		Andaman	0.000676686	0.000804309	0.000737786	0.000739593	6.38306e-05
18	DU60		Dugong	Dugong dugong	male	1.92	Trang		Andaman	0.0383123	0.0546741	0.0413946	0.0447937	0.00869439
19	DU65		Dugong	Dugong dugong	male		Rayong		Gulf of Thailand	0.211244	0.29199	0.317922	0.273719	0.0556368
20	DU70		Dugong	Dugong dugong	male	2	Krabi		Andaman	0.220042	0.157837	0.189716	0.189198	0.031106
21	DU75		Dugong	Dugong dugong	male	2.4	Trang		Andaman	0.156097	0.307647	0.302543	0.255429	0.086062
22	DU78		Dugong	Dugong dugong	female	2.31	Chumphon		Gulf of Thailand	0.191189	0.651894	0.523679	0.455587	0.237781
23	DU84		Dugong	Dugong dugong	male	2.19	Phuket		Andaman	0.0186063	0.00730905	0.00989017	0.0119352	0.00591976
24	DU88		Dugong	Dugong dugong	male	2.35	Suratthani		Gulf of Thailand	0.308049	0.359342	0.61802	0.42847	0.166146
25	DU98		Dugong	Dugong dugong	male	2.14	Rayong		Gulf of Thailand		3.75906	1.27334	1.68702	1.8993
26	DU103		Dugong	Dugong dugong	female	1.67	Trang		Andaman	0.0399093	0.00464028	0.00512026	0.0165566	0.0202255
27	DU119		Dugong	Dugong dugong	male	1.53	Trang		Andaman	0.0260642	0.686411	0.147217	0.286564	0.351536
28	DU120		Dugong	Dugong dugong	male	1.51	Trang		Andaman	0.0763644	0.00695941	0.00802419	0.0304493	0.0397672
29	DU126		Dugong	Dugong dugong	female	2	Trang		Andaman	0.560242	15.9431	0.722865	5.74209	8.83475
30	DU127		Dugong	Dugong dugong	female	1.09	Chonburi		Gulf of Thailand	0.40482	0.0852165	0.0260268	0.172021	0.20377
31	DU128		Dugong	Dugong dugong	male		Phuket		Andaman	0.238568	0.0873428	3.20545	1.17712	1.75821
32	DU130		Dugong	Dugong dugong	male	2.09	Rayong		Gulf of Thailand	0.276353	0.573246	1.05733	0.635643	0.394209
33	DU144		Dugong	Dugong dugong	male	2.64	Trang		Andaman	1.25589	0.548759	1.02313	0.942591	0.360377
34	DU145		Dugong	Dugong dugong	male	1.56	Trang		Andaman	0.369986	0.313151	0.399209	0.360782	0.0437616
35	DU146		Dugong	Dugong dugong	male	2.14	Phuket		Andaman	0.292672	0.492328	0.168793	0.317931	0.16324
36	DU248		Dugong	Dugong dugong	female	1.91	Trang		Andaman	0.266093	0.55081	0.383561	0.400154	0.143082
37	DU249		Dugong	Dugong dugong	female	2	Phang Nga		Andaman	0.00937961	0.0540894	0.0262173	0.0298954	0.0225807
38	DU250		Dugong	Dugong dugong	female	2.38	Chonburi		Gulf of Thailand	0.0283825	0.0278112	0.0207028	0.0256322	0.00427854
39	DU260		Dugong	Dugong dugong	female	1.74	Trang		Andaman	0.0523778		0.0134255	0.0619414	0.0539373
40	DU262		Dugong	Dugong dugong	female	1.23	Phang Nga		Andaman		0.199932	0.0531796	13.7396	23.5786
41	DU264		Dugong	Dugong dugong	male	2.2	Krabi		Andaman	0.208261	0.263795	0.329818	0.267291	0.0608541
42	DU268		Dugong	Dugong dugong	male	1.92	Phuket		Andaman	0.0436487	0.0850452	0.0393711	0.0560217	0.0252259
43	DU276		Dugong	Dugong dugong	male	1.4	Stun		Andaman	0.0269251	0.106364	0.034255	0.0558481	0.0439014
44	DU299		Dugong	Dugong dugong	female	2.81	Trang		Andaman	0.1658	0.345082	0.109837	0.206906	0.122891
45	DU300		Dugong	Dugong dugong	female	2.24	Trang		Andaman	0.0102317	0.0424079	0.0126284	0.021756	0.0179251
46	DU301		Dugong	Dugong dugong	male	2.44	Phang Nga		Andaman	0.0432621	0.142912	0.0885874	0.0915871	0.0498926
47	DU306		Dugong	Dugong dugong	female	2.02	Trang		Andaman	0.0134624	0.0246976	0.0104088	0.0161896	0.00752468
48	DU307		Dugong	Dugong dugong	female	2.78	Trang		Andaman	0.00901546	0.0145748	0.00801741	0.0105359	0.00353321
49	DU309		Dugong	Dugong dugong	male	1.04	Trang		Andaman	0.710828	1.06839	1.16412	0.98111	0.238915
50	DU310		Dugong	Dugong dugong	male	2.33	Trang		Andaman	0.0207965	0.0261756	0.0156267	0.0208662	0.00527478
51	DU311		Dugong	Dugong dugong	female	1.07	Trang		Andaman	0.0176484	0.0533628	0.0185624	0.0298579	0.020361
52	DU312/DHDU-3		Dugong	Dugong dugong	female	2.57	Suratthani		Gulf of Thailand	0.0216203	0.034551	0.0315248	0.029232	0.00676339
53	DU313		Dugong	Dugong dugong	female	2.7	Phang Nga		Andaman	0.536826	0.505566	0.222702	0.421698	0.173043
54	DU314		Dugong	Dugong dugong	female	1.11	Phang Nga		Andaman	0.0660905	0.186526	0.0764498	0.109689	0.0667442
55	DU315		Dugong	Dugong dugong	male	1.34	Trang		Andaman	0.054303	0.0874098	0.0592248	0.0669792	0.0178637
56	DU316		Dugong	Dugong dugong	female	1.62	Stun		Andaman	0.284709	0.194499	0.189348	0.222852	0.0536313
57	DU321		Dugong	Dugong dugong	male	1.5	Trang		Andaman	0.097447	0.270489	0.127449	0.165128	0.0924701
58	DU322		Dugong	Dugong dugong	male	2.42	Phang Nga		Andaman	0.145145	0.236199	0.142673	0.174672	0.0532978
59	DU323		Dugong	Dugong dugong	male	1.92	Trang		Andaman	0.0385268	0.160724	0.0395233	0.0795915	0.070265
60	DU324		Dugong	Dugong dugong	male	1.6	Trang		Andaman	0.118965	0.228967	0.103517	0.150483	0.0684068
61	DU327/_____ 24 __		Dugong	Dugong dugong	male	1.72	Suratthani		Gulf of Thailand	0.0094568	0.0246193	0.0194742	0.0178501	0.0077106
62	DU328		Dugong	Dugong dugong	female	2.59	Stun		Andaman	0.0269073	0.0669428	0.0282152	0.0406884	0.0227464
63	DU329		Dugong	Dugong dugong	female	1.63	Trang		Andaman	0.0344402	0.03865	0.0225336	0.0318746	0.00835892
64	DU330		Dugong	Dugong dugong	female	2.56	Trang		Andaman	0.00606451	0.0156409	0.0142845	0.0119966	0.00518193
65	DU331		Dugong	Dugong dugong	male	1.23	Trang		Andaman	0.460795	0.949893	0.822238	0.744309	0.253691
66	DU332		Dugong	Dugong dugong	male	1.94	Trang		Andaman	0.0424516	0.077907	0.0652941	0.0618842	0.017972
67	DU334		Dugong	Dugong dugong	male	1.66	Trang		Andaman	0.0819534	0.259131	0.237794	0.19296	0.0967242
68	DU336		Dugong	Dugong dugong	male	2	Trang		Andaman	0.0852666	0.183466	0.150641	0.139791	0.0499906
69	DU337		Dugong	Dugong dugong	male	2.81	Trang		Andaman	0.0237408	0.0378482	0.0256242	0.0290711	0.00765932
70	DU338		Dugong	Dugong dugong	female	1.1	Trang		Andaman	0.314932	1.14144	0.73418	0.730183	0.413266
71	DU339		Dugong	Dugong dugong	male	1.16	Trang		Andaman	0.0388509	0.0291462	0.0154398	0.0278123	0.0117624
72	DU340		Dugong	Dugong dugong	female	1.58	Trang		Andaman	0.046467	0.248723	0.0544263	0.116539	0.114544
73	DU341		Dugong	Dugong dugong	female	2.67	Phuket		Andaman	0.0167914	0.0286726	0.0169267	0.0207969	0.0068209
74	DU344		Dugong	Dugong dugong	female	1.6	Trang		Andaman	0.132356	0.197058	0.110619	0.146677	0.0449638
75	DU345		Dugong	Dugong dugong	male	2.52	Krabi		Andaman	0.0280042	0.123866	0.0682806	0.0733837	0.0481344
76	DU346		Dugong	Dugong dugong	male	2.14	Trang		Andaman	0.257569	2.02496	0.336258	0.872928	0.998462
77	DU347		Dugong	Dugong dugong	female	2.58	Krabi		Andaman	0.0879942	0.0670667	0.108604	0.0878883	0.0207688
78	DU348		Dugong	Dugong dugong	male	2.4	Trang		Andaman	0.095724	0.404584	0.259607	0.253305	0.154526
79	DU349		Dugong	Dugong dugong	female	2.35	Trang		Andaman	0.022732	0.0146373	0.0534618	0.030277	0.0204824
80	DU350		Dugong	Dugong dugong	female	1.38	Phuket		Andaman	0.132827	0.522969	0.116837	0.257544	0.230003
81	DU351		Dugong	Dugong dugong	male	1.09	Krabi		Andaman	0.0669339	0.234037	0.0926484	0.131207	0.0899774
82	DU352		Dugong	Dugong dugong	male	1.76	Phuket		Andaman	0.0171516	0.0199486	0.0337859	0.0236287	0.00890688
83	DU353		Dugong	Dugong dugong	male	1.11	Trang		Andaman	0.0140094	0.426784	0.0296199	0.156805	0.23394
84	DU354		Dugong	Dugong dugong	female	2.04	Trang		Andaman	0.0180145	0.091666	0.0147191	0.0414665	0.0435052
85	DU355		Dugong	Dugong dugong	male	2.14	Trang		Andaman	0.0473546	0.007955	0.0552383	0.0368493	0.0253318
86	DU358		Dugong	Dugong dugong	female	1.97	Trang		Andaman	0.251825	0.329986	0.0442363	0.208683	0.147679
87	DU359		Dugong	Dugong dugong	male	2.11	Trang		Andaman	0.173156	0.0311952	0.0878904	0.0974138	0.0714579
88	DU360		Dugong	Dugong dugong	male	0.95	Trang		Andaman	0.584789		1.11954	12.9214	20.9062
89	DU364		Dugong	Dugong dugong	male	3.64	Trang		Andaman	0.0165549	0.00292483	0.0524199	0.0239665	0.0255664
90	DU365		Dugong	Dugong dugong	male	2.7	Trang		Andaman	0.396274	0.837996	0.67731	0.637193	0.223577
91	DU366		Dugong	Dugong dugong	female	2.55	Trang		Andaman	0.0861305	0.152898	0.144753	0.127927	0.0364253
92	DU367		Dugong	Dugong dugong	female	2.4	Chumphon		Gulf of Thailand	0.145988	0.139658	0.177149	0.154265	0.0200693
93	DU368		Dugong	Dugong dugong	male	1.86	Trang		Andaman	0.0380546	0.0407708	0.03707	0.0386318	0.00191676
94	DU371		Dugong	Dugong dugong	male	1.13	Trang		Andaman	0.148705	0.786284	0.237591	0.39086	0.345319
95	DU372		Dugong	Dugong dugong	female	1.25	Trang		Andaman	0.0227145	0.0438101	0.0203175	0.0289473	0.0129272
96	DU373		Dugong	Dugong dugong	female	2.48	Krabi		Andaman	0.0327008	0.0142197	0.0316151	0.0261785	0.0103709
97	DU374		Dugong	Dugong dugong	female	1.3	Stun		Andaman	0.0813569	0.0648575	0.0771287	0.0744477	0.0085702
98	DU375		Dugong	Dugong dugong	male	2.36	Trang		Andaman	0.00337654	0.0112961	0.0101906	0.00828776	0.00428901
99	DU377		Dugong	Dugong dugong	male	2.68	Phang Nga		Andaman	0.0187742	0.490583	0.0470114	0.185456	0.264625
100	DU378		Dugong	Dugong dugong	female	1.54	Trang		Andaman	0.0100647	0.00985647	0.0156473	0.0118561	0.00328486
101	DU380		Dugong	Dugong dugong	female	2.6	Phang Nga		Andaman	0.0564307	0.0221955	0.0438946	0.0408403	0.0173207
102	DU384		Dugong	Dugong dugong	female	1.01	Trang		Andaman	0.157108	0.0445901	0.0995538	0.100417	0.0562638
103	DU388		Dugong	Dugong dugong	female	2.66	Trang		Andaman	0.0788164	0.10757	0.108269	0.0982186	0.0168065
104	DU389		Dugong	Dugong dugong	female	1.32	Trang		Andaman	0.0807387	0.0389455	0.0965561	0.0720801	0.0297653
105	DU392		Dugong	Dugong dugong	male	2.63	Rayong		Gulf of Thailand	0.152686	0.0240695	0.137429	0.104728	0.0702675
106	DU395		Dugong	Dugong dugong	female	1.3	Phang Nga		Andaman	0.233573	0.169282	0.200613	0.201156	0.0321488
107	DU396		Dugong	Dugong dugong	male		Phang Nga		Andaman	0.015488	0.0171107	0.0270446	0.0198811	0.0062566
108	DU397		Dugong	Dugong dugong	male	2.08	Trang		Andaman	0.0383058	0.0340169	0.0313585	0.0345604	0.00350541
109	DU398		Dugong	Dugong dugong	male	1.09	Trang		Andaman	0.00904797	0.0209229	0.0156715	0.0152142	0.00595068
110	DU401		Dugong	Dugong dugong	male	1.87	Krabi		Andaman	0.014655	0.00444613	0.0073751	0.00882542	0.00525671
111	DU405		Dugong	Dugong dugong	male	2.63	Trang		Andaman	0.0843832	0.0485638	0.0356358	0.0561943	0.0252536
112	DU407		Dugong	Dugong dugong	male	1.09	Trang		Andaman	0.286423	1.36405		13.6558	22.2297
113	DU417		Dugong	Dugong dugong	male	1.2	Trang		Andaman	0.00809333	0.0034546	0.017809	0.00978564	0.00732531
114	DU419		Dugong	Dugong dugong	female	2.81	Krabi		Andaman	0.0188874	0.0754364	0.0257701	0.0400313	0.0308542
115	DU420		Dugong	Dugong dugong	male	2.46	Phang Nga		Andaman	0.024835	0.00180802	0.0399048	0.0221826	0.0191864
116	DU421		Dugong	Dugong dugong	female	2.3	Trang		Andaman	0.24552	1.10072	0.286508	0.544249	0.482353
117	DU422		Dugong	Dugong dugong	male	2.2	Trang		Andaman	0.128388	0.0260693	0.00934932	0.0546022	0.064445
118	DU423		Dugong	Dugong dugong	female	2.35	Trang		Andaman	0.00998656	0.00406106	0.00984667	0.00796476	0.00338143
119	DU426		Dugong	Dugong dugong	male	1.93	Phang Nga		Andaman	0.0700473	0.266114	1.22702	0.521059	0.619186
120	DU427		Dugong	Dugong dugong	female	2.7	Phang Nga		Andaman	0.00161534	0.0303486	0.013364	0.0151093	0.0144459
121	DU428		Dugong	Dugong dugong	male	1.32	Trang		Andaman	0.0538925	0.0334254	0.0166244	0.0346474	0.018664
122	DU429		Dugong	Dugong dugong	male	0.9	Trang		Andaman	1.29657	0.421603	0.431238	0.716471	0.502406
123	DU430		Dugong	Dugong dugong	female	2.02	Stun		Andaman	0.00894606	0.00365954	0.0100901	0.00756525	0.00343047
124	DU431		Dugong	Dugong dugong	male	0.98	Trang		Andaman	0.0393285	0.135746	0.100814	0.0919628	0.0488145
127	DU439		Dugong	Dugong dugong	male	2.99	Krabi		Andaman	0.00631265	0.00252695	0.00150689	0.00344883	0.00253204
128	DU440		Dugong	Dugong dugong	male	1.29	Trang		Andaman	0.0224058	0.0668702	0.0407624	0.0433461	0.0223445
129	DU441		Dugong	Dugong dugong	male	2.57	Krabi		Andaman	0.0032654	0.00366589	0.00444323	0.00379151	0.000598873
130	DU442		Dugong	Dugong dugong	female	1.23	Trang		Andaman	0.00591107	0.00456143	0.00339416	0.00462222	0.00125955

## Sheet: Sheet2
Common Name	Scientific Name	mean	SD
Blainville's beaked whale	Mesoplodon densirostris	0.0735116	0.0156309
Blue whale	Balaenoptera musculus	0.035413	0.0156309
Bryde's whale	Balaenoptera edeni	0.0265581	0.0483658
Common bottlenose dolphin	Tursiops truncatus	0.00850877	0.004696
Cuvier's beaked whale	Ziphius cavirostris	0.0575271	0.00725031
Dwarf sperm whale	Kogia sima	0.0533418	0.0660839
False killer whale	Pseudorca crassidens	0.155137	0.136549
Finless porpoise	Neophocaena phocaenoides	0.0524991	0.0776961
Fraser's dolphin	Lagenodelphis hosei	0.125425	0.164292
Indo-Pacific bottlenose dolphin	Tursiops aduncus	0.206163	0.274551
Indo-Pacific humpback dolphin	Sousa chinensis	0.0468513	0.0507713
Irrwaddy dolphin	Orcaella brevirostris	0.0687079	0.043505
Long-beaked common dolphin	Delphinus delphis	0.0127868	0.00897174
Omura's whale	Balaenoptera omurai	0.231045	0.229674
Pantropical spotted dolphin	Stenella attenuata	0.186581	0.165098
Pygmy sperm whale	Kogia breviceps	0.354671	0.24662
Risso's dolphin	Grampus griseus	0.126517	0.133886
Rough-toothed dolphin	Steno bredanensis	0.101561	0.159221
Short-finned pilot whale	Globicephala macrorhynchus	0.102782	0.0409674
Sperm whale	Physeter macrocephalus	0.112129	0.186947
Spinner dolphin	Stenella longirostris	0.0987664	0.120812
Striped dolphin	Stenella coeruleoalba	0.0725558	0.166557
Dugong	Dugong dugong	0.297314	0.909959
